# Supplementary material for: Cuscutae semen alleviates CUS-induced depression-like behaviors in mice via the gut microbiota-neuroinflammation axis
Source: Frontiers journal article supplement (doi:10.3389/fphar.2023.1107781), 2023-02-24
Supplement: Data_Sheet_1.PDF [file Data_Sheet_1.PDF]

**Supplementary Figure 1**

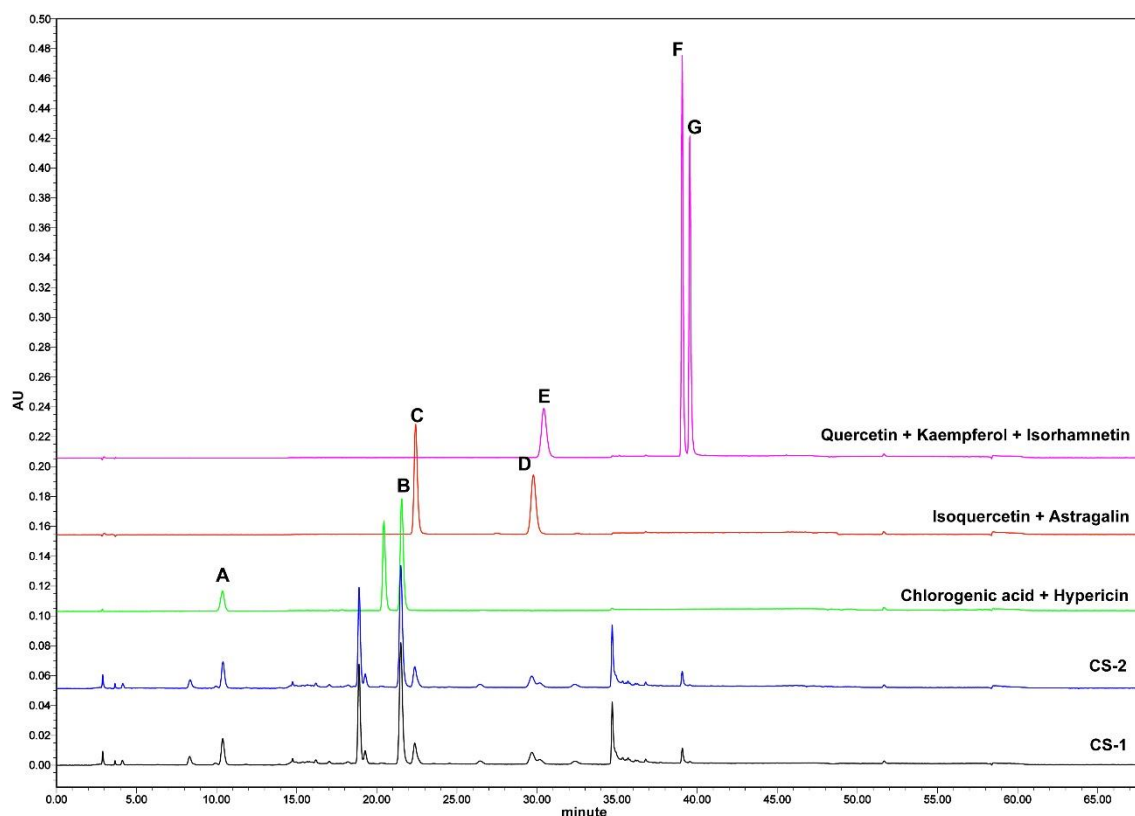

Supplementary Figure 1. Chromatograms of HPLC analysis. CS and seven standards (quercetin, isoquercetin, astragalin, hypericin, kaempferol, chlorogenic acid, and isorhamnetin) were analyzed by using a Shimadzu HPLC system (Waters 2695). The chromatographic conditions: column: (PFchrom EP C18, 4.6\*250mm, 5um); detection wavelength: 200 nm-600 nm; injection volume: 10ul; flow rate: 1.0ml/min; and run time: 65 min. A: Chlorogenic acid; B: Hypericin; C: Isoquercetin; D: Astragalin; E: Quercetin; F: Kaempferol; G: Isorhamnetin.

## Supplementary Figure 2

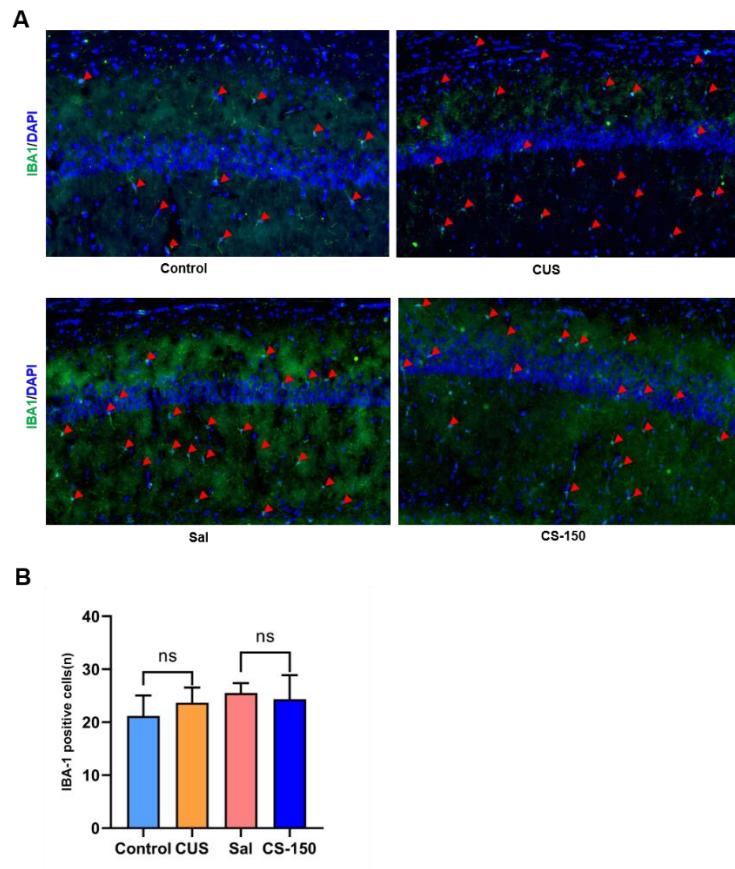

Supplementary Figure 2. CS had no effect on microglial in CA1. (A) Images of IBA1 positive cell in CA1 (under  $\times 200$  magnification) obtained from the immunofluorescence test. (B) The number of IBA1 positive cell. The data are expressed as the mean  $\pm$  standard error. ns  $P > 0.05$ .

### Supplementary Figure 3

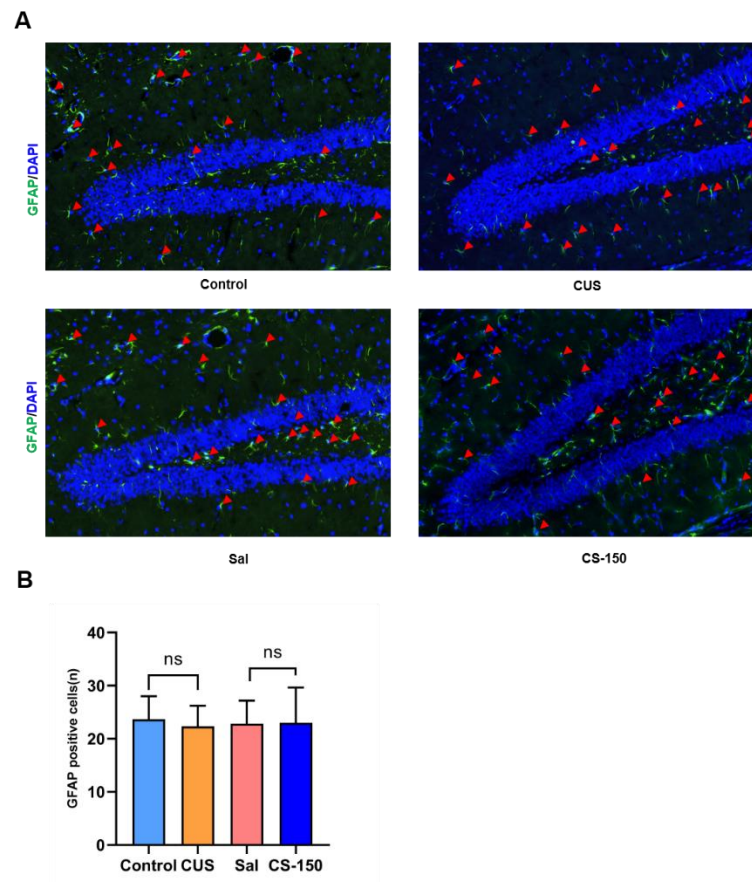

Supplementary Figure 3. CS had no effect on astrocyte in DG. (A) Images of GFAP positive cell in DG (under  $\times 200$  magnification) obtained from the immunofluorescence test. (B) The number of GFAP positive cell. The data are expressed as the mean  $\pm$  standard error. ns  $P > 0.05$ .

## Supplementary Figure 4

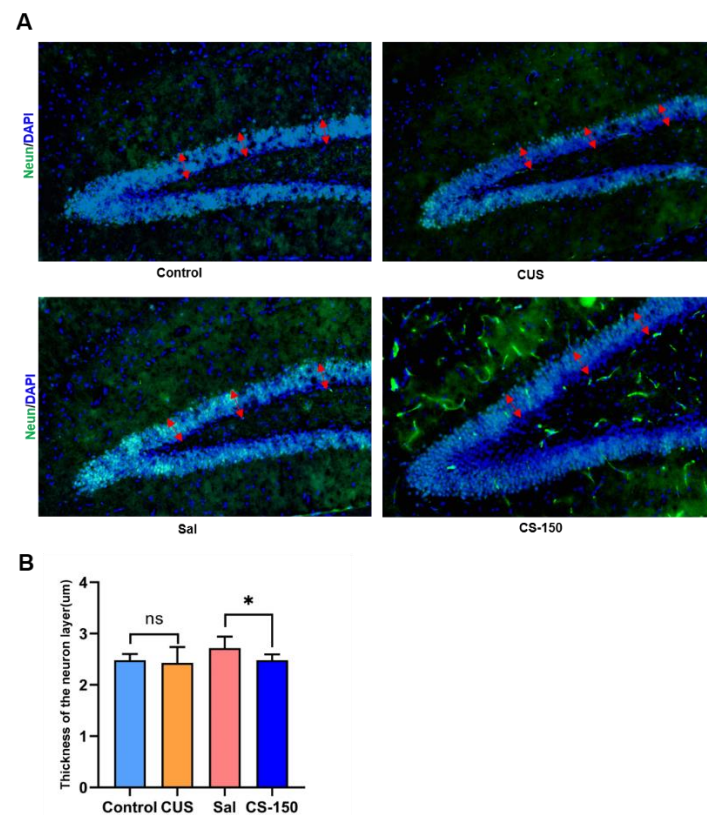

Supplementary Figure 4. CS could increase the thickness of neuron layer in the DG. (A) Images of Neun positive cell in DG (under  $\times 200$  magnification) obtained from the immunofluorescence test. (B) The thickness of neuron layer in the DG. The data are expressed as the mean  $\pm$  standard error. ns  $P > 0.05$ . \* $P < 0.05$

## Supplementary Figure 5

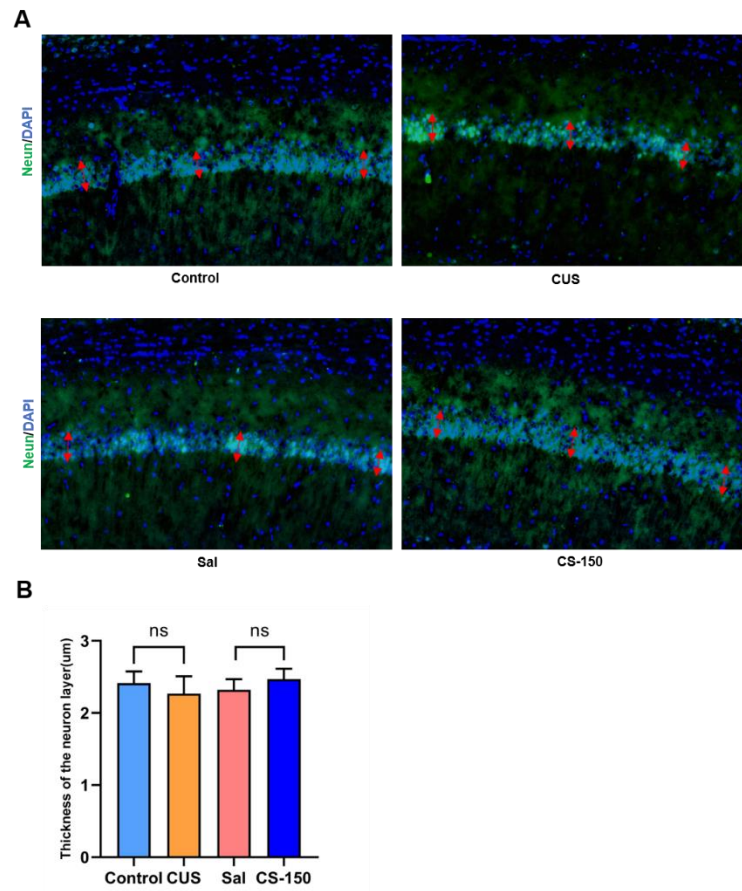

Supplementary Figure 5. CS had no effect on the thickness of neuron layer in the CA1. (A) Images of Neun positive cell in CA1 (under  $\times 200$  magnification) obtained from the immunofluorescence test. (B) The thickness of neuron layer in the CA1. The data are expressed as the mean  $\pm$  standard error. ns  $P > 0.05$ .

## Supplementary Figure 6

**A**

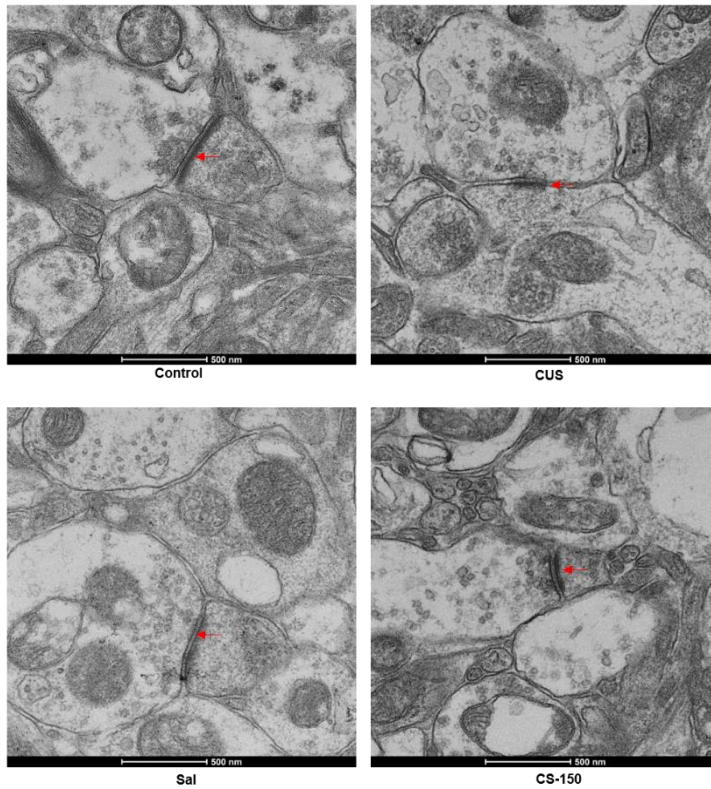

**B**

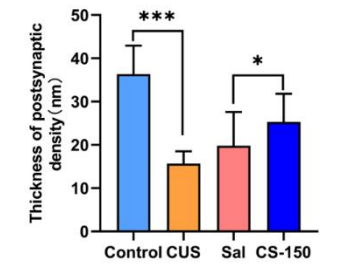

**C**

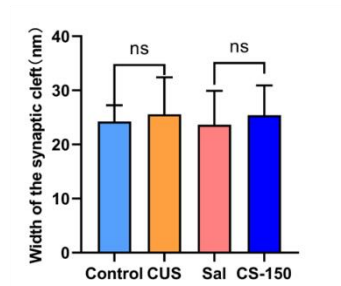

Supplementary Figure 6. CS could change the synaptic ultrastructure. (A) Synaptic ultrastructure of mPFC under ×60,000 magnification. (B) Thickness PSD in the HIP. (C) Synaptic cleft width in the HIP. The data are expressed as the mean ± standard error. \* $P < 0.05$ , \*\*\* $P < 0.001$ , ns  $P > 0.05$ .

**Supplementary Table 1 Compound content in CS extract**

| Compound         | CS Quality(mg) | Appearance time(min) | Peak area | Content (%) |
|------------------|----------------|----------------------|-----------|-------------|
| Chlorogenic acid | 1.0029         | 10.395               | 235912    | 0.24        |
| Hypericin        | 1.0029         | 21.503               | 1124549   | 0.27        |
| Isoquercetin     | 1.0029         | 22.375               | 226032    | 0.056       |
| Astragalin       | 1.0029         | 29.68                | 169478    | 0.047       |
| Quercetin        | 1.0029         | 30.174               | 59052     | 0.017       |
| Kaempferol       | 1.0029         | 39.071               | 84844     | 0.011       |
| Isorhamnetin     | 1.0029         | 39.055               | 84640     | 0.011       |

**Supplementary Table 2 Chronic unpredictable stress procedure**

| Time   | Chronic unpredictable stress | Notes                                                                                                                        |
|--------|------------------------------|------------------------------------------------------------------------------------------------------------------------------|
| Day 1  | water deprivation for 24 h   | -                                                                                                                            |
| Day 2  | food deprivation for 24 h    | -                                                                                                                            |
| Day 3  | cold swim at 4°C for 30 min  | -                                                                                                                            |
| Day 4  | 6-h cage tilt (45°)          | -                                                                                                                            |
| Day 5  | overnight illumination       | -                                                                                                                            |
| Day 6  | restraint stress for 2 h     | mice were placed in 50 ml centrifuge tube with opening in one corner allowing free respiration but restricting any movement. |
| Day 7  | stroboscopic stimulus        | 150 flashes/min, 200 Lumen                                                                                                   |
| Day 8  | a soiled cage environment    | a soiled cage environment (200 mL water in 100 g sawdust bedding)                                                            |
| Day 9  | water deprivation for 24 h   | -                                                                                                                            |
| Day 10 | food deprivation for 24 h    | -                                                                                                                            |
| Day 11 | cold swim at 4°C for 30 min  | -                                                                                                                            |
| Day 12 | 6-h cage tilt (45°)          | -                                                                                                                            |
| Day 13 | overnight illumination       | -                                                                                                                            |
| Day 14 | restraint stress for 2 h     | mice were placed in 50 ml centrifuge tube with opening in one corner allowing free respiration but restricting any movement. |
| Day 15 | stroboscopic stimulus        | 150 flashes/min, 200 Lumen                                                                                                   |
| Day 16 | a soiled cage environment    | a soiled cage environment (200 mL water in 100 g sawdust bedding)                                                            |
| Day 17 | water deprivation for 24 h   | -                                                                                                                            |
| Day 18 | food deprivation for 24 h    | -                                                                                                                            |
| Day 19 | cold swim at 4°C for 30 min  | -                                                                                                                            |
| Day 20 | 6-h cage tilt (45°)          | -                                                                                                                            |
| Day 21 | overnight illumination       | -                                                                                                                            |

**Supplementary Table 3 the information of antibodies utilized in this study**



| Antibodies                                          | Source                           | Identifier | Dilution |
|-----------------------------------------------------|----------------------------------|------------|----------|
| NF- $\kappa$ B (Rabbit)                             | Abcam (Cambridge, UK)            | Ab194926   | 1:1000   |
| COX-2 (Rabbit)                                      | Abcam (Cambridge, UK)            | Ab179800   | 1:1000   |
| NLPR3 (Rabbit)                                      | Abcam (Cambridge, UK)            | Ab263899   | 1:1000   |
| NRF2 (Mouse)                                        | Proteintech Group (Wuhan, China) | 16396-1-AP | 1:1000   |
| HO-1 (Rabbit)                                       | Abcam (Cambridge, UK)            | Ab189491   | 1:1000   |
| $\beta$ -actin (Mouse)                              | Beyotime (Shanghai, China)       | AF0003     | 1:3000   |
| GAPDH (Mouse)                                       | Proteintech Group (Wuhan, China) | 60004-1-Ig | 1:10000  |
| Neun (Mouse)                                        | Proteintech Group (Wuhan, China) | 66836-1    | 1:200    |
| GFAP (Mouse)                                        | Beyotime (Shanghai, China)       | AG259-1    | 1:100    |
| IBA-1(Rabbit)                                       | Proteintech Group (Wuhan, China) | 10904-1    | 1:200    |
| HRP-labeled Goat Anti-Rabbit IgG(H+L)               | Beyotime (Shanghai, China)       | A0208      | 1:5000   |
| HRP-labeled Goat Anti-Mouse IgG(H+L)                | Beyotime (Shanghai, China)       | A0216      | 1:5000   |
| Alexa Fluor 488-labeled Goat Anti- Rabbit IgG (H+L) | Beyotime (Shanghai, China)       | A0423      | 1:200    |
| Alexa Fluor 488-labeled Goat Anti- Mouse IgG (H+L)  | Beyotime (Shanghai, China)       | A0428      | 1:200    |
